# Supplementary material for: Understanding the role of urban design in disease spreading
Source: bioRxiv or medRxiv preprint supplement (doi:10.1101/766667), 2020-03-19

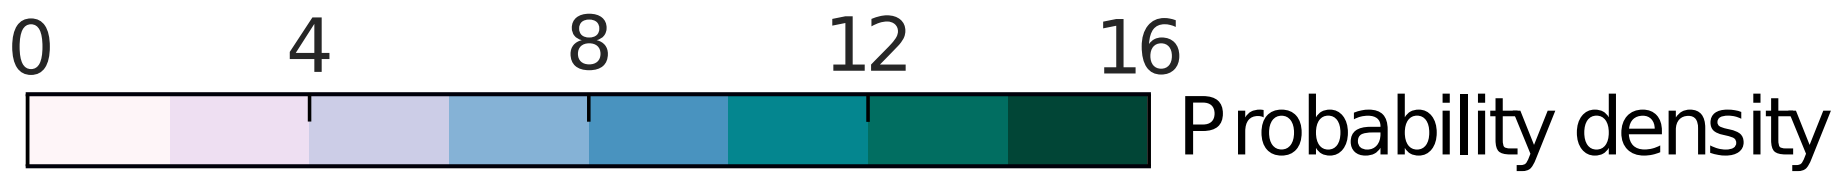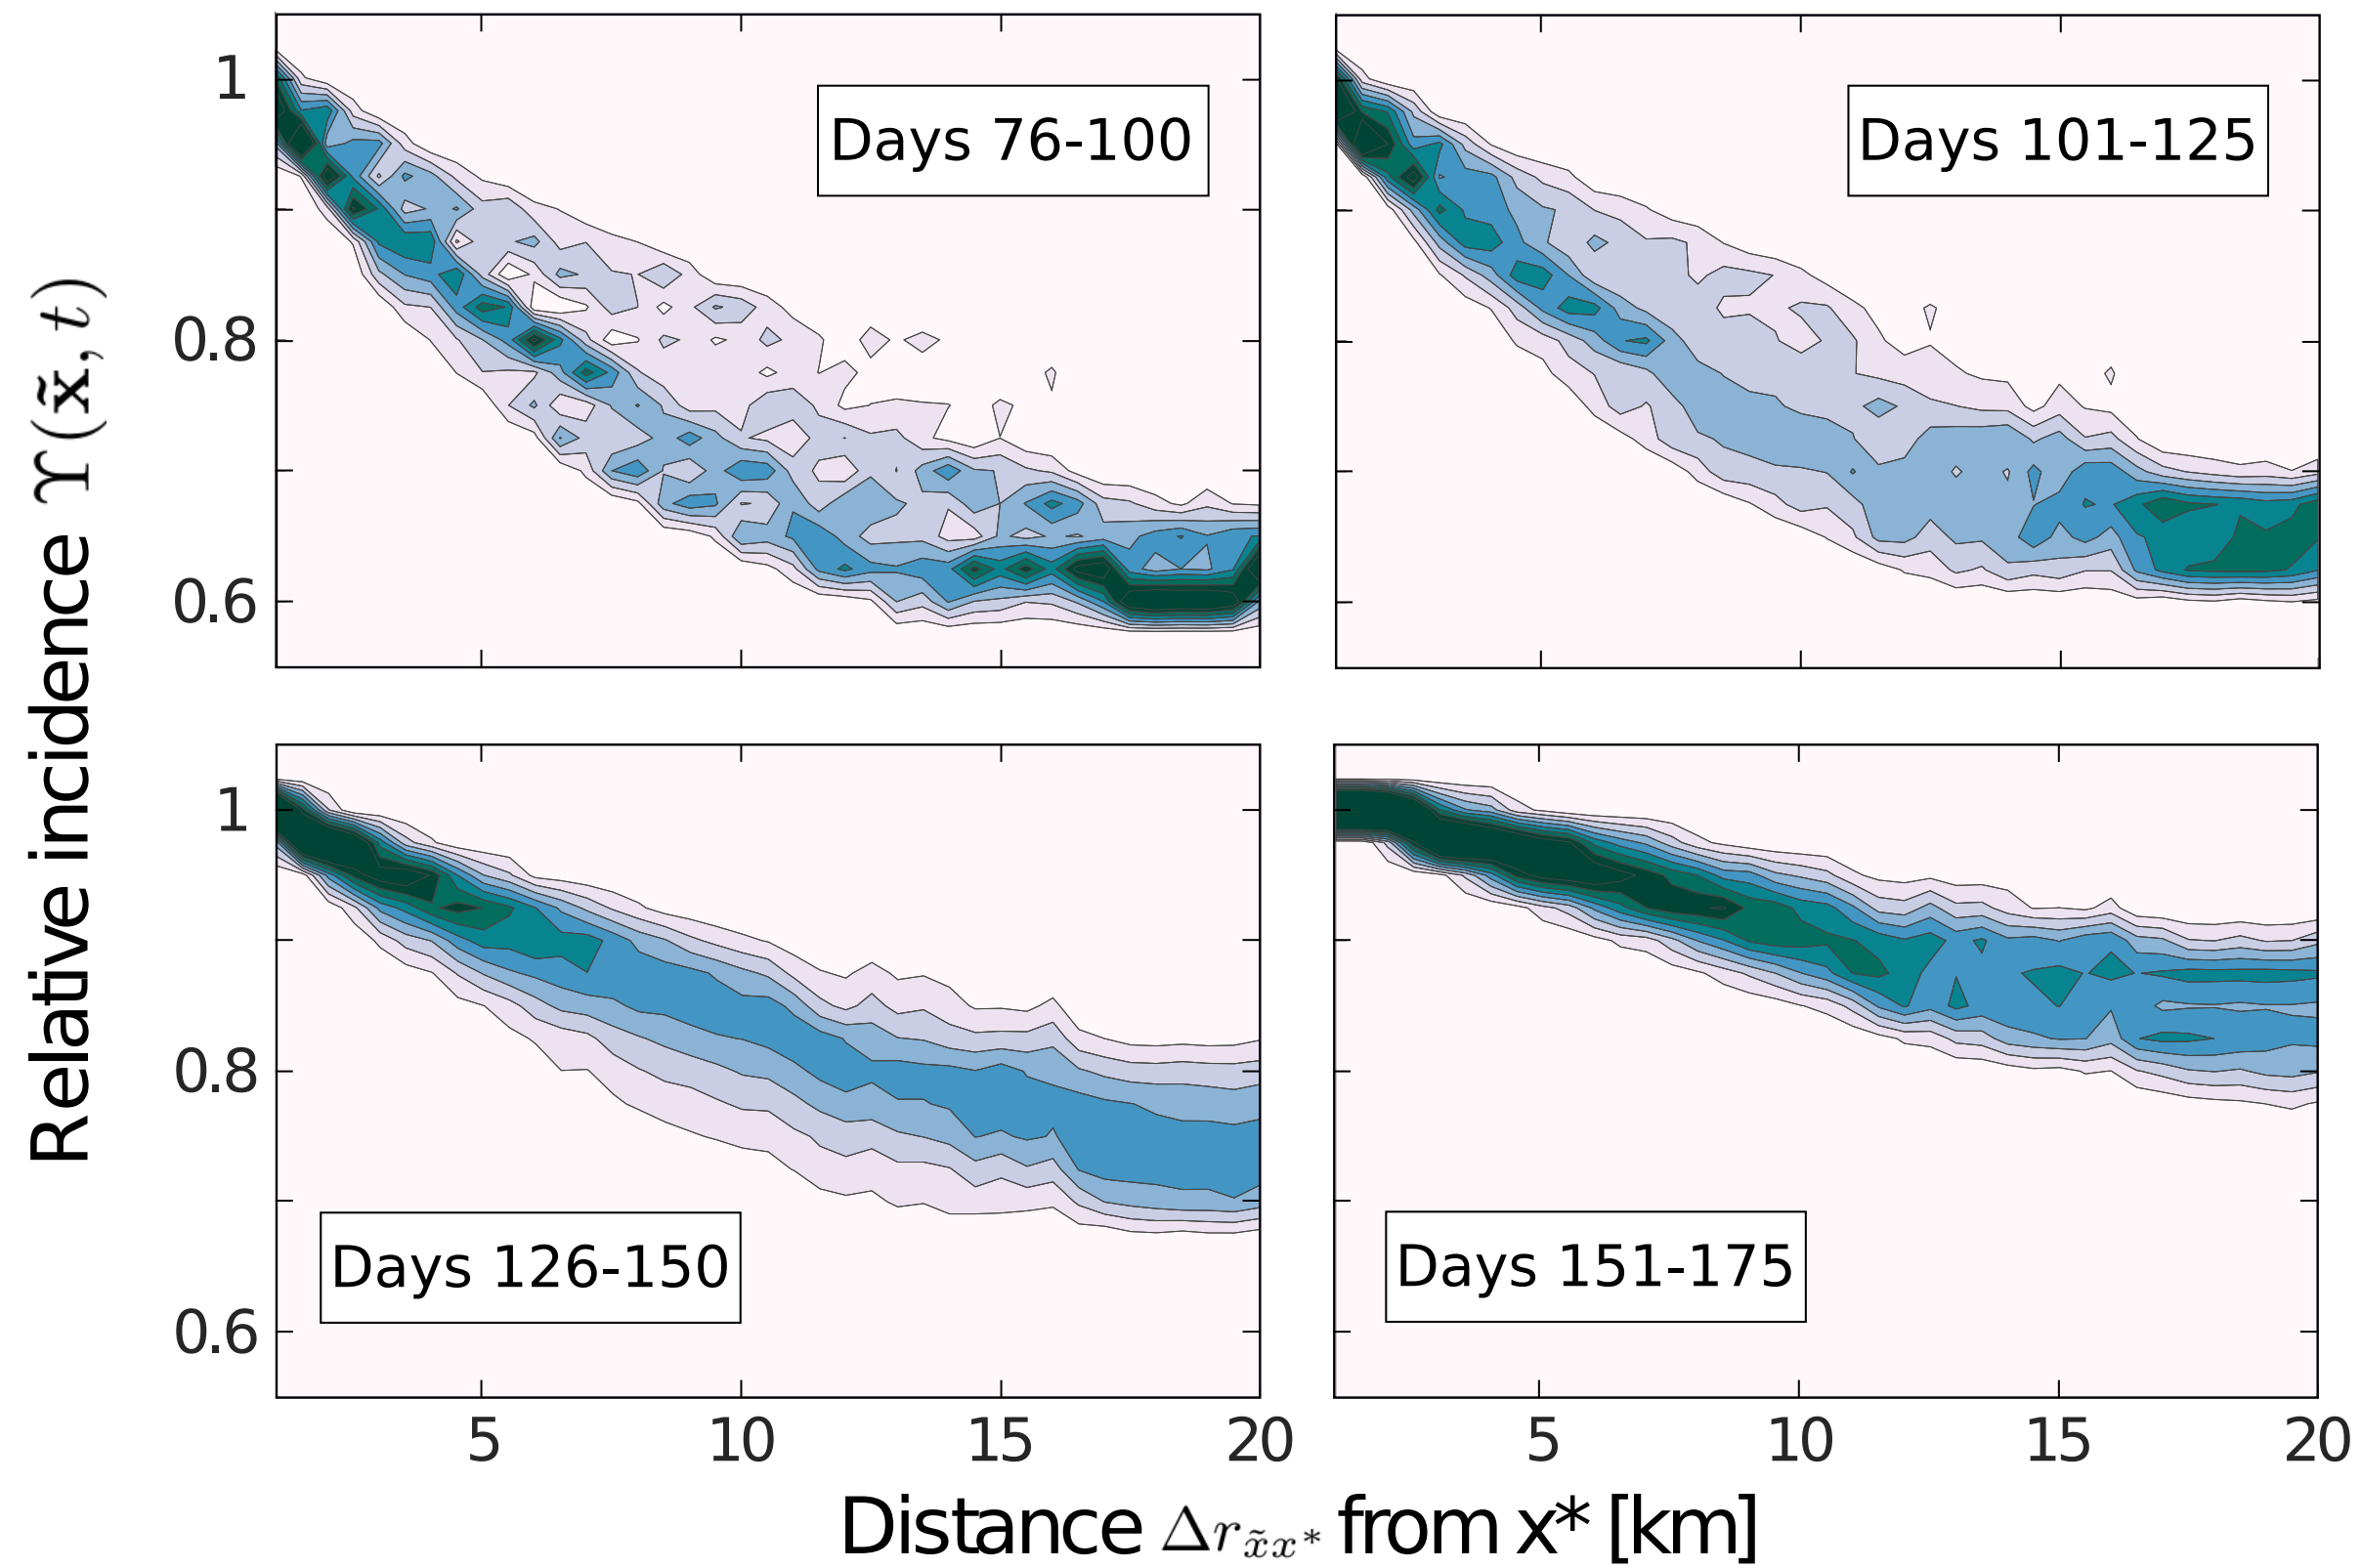

Supplement: Supplementary file [file media-3.pdf]
